# Supplementary material for: Formulation and Evaluation of Chitosan/NaCl/Maltodextrin Microparticles as a Saltiness Enhancer: Study on the Optimization of Excipients for the Spray-Drying Process
Source: MDPI journal article supplement (doi:10.3390/polym13244302), 2021-12-09
Supplement: s1 [file s1]

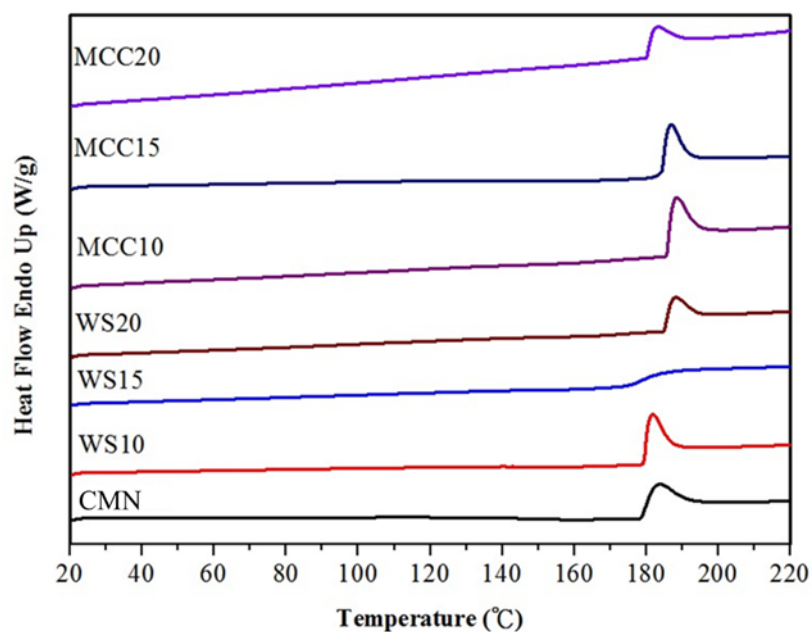

Figure S1. The DSC curves of chitosan/NaCl/maltodextrin microparticles. CMN indicates the formulation with only maltodextrin as the excipient. MCC indicates the formulations with maltodextrin and micro-crystalline cellulose as the excipients. WS indicates the formulations with maltodextrin and waxy maize starch as the excipients. The compositions of each formulation are the same as in Table 1.
